# Supplementary material
Source: PubMed Central journal article supplement (PMC5560988)
Supplement: NIHMS883042-supplement-Appendix.pdf [file NIHMS883042-supplement-Appendix.pdf]

## APPENDIX

### Inclusion criteria diagnosis codes for cervical spondylotic myelopathy and radiculopathy

| <b>Diagnosis</b>                                                | <b>Code</b> | <b>Type of Code</b> |
|-----------------------------------------------------------------|-------------|---------------------|
| Cervical spondylosis without myelopathy                         | 721.0       | ICD-9-CM Diagnosis  |
| Cervical spondylosis with myelopathy                            | 721.1       | ICD-9-CM Diagnosis  |
| Displacement of cervical intervertebral disc without myelopathy | 722.0       | ICD-9-CM Diagnosis  |
| Degeneration of cervical intervertebral disc                    | 722.4       | ICD-9-CM Diagnosis  |
| Intervertebral disc disorder with myelopathy, cervical region   | 722.71      | ICD-9-CM Diagnosis  |
| Postlaminectomy syndrome, cervical region                       | 722.81      | ICD-9-CM Diagnosis  |
| Other and unspecified disc disorder, cervical region            | 722.91      | ICD-9-CM Diagnosis  |
| Spinal stenosis in cervical region                              | 723.0       | ICD-9-CM Diagnosis  |
| Cervical radiculopathy                                          | 723.4       | ICD-9-CM Diagnosis  |

### Inclusion criteria procedure codes for ACDF

| <b>Procedure</b>                                                                   | <b>Code</b> | <b>Type of Code</b> |
|------------------------------------------------------------------------------------|-------------|---------------------|
| Anterior interbody fusion, with discectomy and decompression;<br>cervical below C2 | 22551       | CPT procedure       |
| Anterior interbody fusion, with discectomy and no decompression                    | 22554       | CPT procedure       |

### Exclusion criteria diagnosis codes

| Exclusion Category and Code                                                    | Type of Code       |
|--------------------------------------------------------------------------------|--------------------|
| <b>Congenital Disorders</b>                                                    |                    |
| 741.00, 741.01, 741.9, 741.91                                                  | ICD-9-CM Diagnosis |
| 754.2                                                                          | ICD-9-CM Diagnosis |
| 756.10, 756.11, 756.12, 756.13, 756.14, 756.15, 756.16, 756.17, 756.18, 756.19 | ICD-9-CM Diagnosis |
| <b>Fractures of spinal column</b>                                              |                    |
| 805.00, 805.01, 805.02, 805.03, a805.04, 805.05, 805.06, 805.07, 805.08        | ICD-9-CM Diagnosis |
| 805.10, 805.11, 805.12, 805.13, 805.14, 805.15, 805.16, 805.17, 805.18         | ICD-9-CM Diagnosis |
| <b>Spinal Cord Injuries</b>                                                    |                    |
| 806.00, 806.01, 806.02, 806.03, 806.04, 806.05, 806.06, 806.07, 806.08, 806.09 | ICD-9-CM Diagnosis |
| 806.10, 806.11, 806.12, 806.13, 806.14, 806.15, 806.16, 806.17, 806.18, 806.19 | ICD-9-CM Diagnosis |
| 952.00, 952.01, 952.02, 952.03, 952.04, 952.05, 952.06, 952.07, 952.08, 952.09 | ICD-9-CM Diagnosis |
| <b>Pathological fracture</b>                                                   |                    |
| 733.1, 733.10, 733.13, 733.95                                                  | ICD-9-CM Diagnosis |
| <b>Vertebral dislocations</b>                                                  |                    |
| 839.00, 839.01, 839.02, 839.03, 839.04, 839.05, 839.06, 839.07, 839.08         | ICD-9-CM Diagnosis |
| 839.10, 839.11, 839.12, 839.13, 839.14, 839.15, 839.16, 839.17, 839.18         | ICD-9-CM Diagnosis |
| <b>Abscess or Osteomyelitis</b>                                                |                    |
| 324.1, 324.9                                                                   | ICD-9-CM Diagnosis |
| 730.00, 730.01, 730.02, 730.03, 730.04, 730.05, 730.06, 730.07, 730.08, 730.09 | ICD-9-CM Diagnosis |
| 730.10, 730.11, 730.12, 730.13, 730.14, 730.15, 730.16, 730.17, 730.18, 730.19 | ICD-9-CM Diagnosis |
| 730.20, 730.21, 730.22, 730.23, 730.24, 730.25, 730.26, 730.27, 730.28, 730.29 | ICD-9-CM Diagnosis |
| 730.30, 730.31, 730.32, 730.33, 730.34, 730.35, 730.36, 730.37, 730.38, 730.39 | ICD-9-CM Diagnosis |
| 730.70, 730.71, 730.72, 730.73, 730.74, 730.75, 730.76, 730.77, 730.78, 730.79 | ICD-9-CM Diagnosis |
| 730.80, 730.81, 730.82, 730.83, 730.84, 730.85, 730.86, 730.87, 730.88, 730.89 | ICD-9-CM Diagnosis |
| 730.90, 730.91, 730.92, 730.93, 730.94, 730.95, 730.96, 730.97, 730.98, 730.99 | ICD-9-CM Diagnosis |
| <b>Ankylosing spondylitis and other inflammatory spondylopathies</b>           |                    |
| 720.0, 720.1, 720.80, 720.81, 720.89, 720.9                                    | ICD-9-CM Diagnosis |
| <b>Malignant neoplasms</b>                                                     |                    |
| 170.2                                                                          | ICD-9-CM Diagnosis |

**Exclusion criteria procedure codes**

| <b>Procedure</b>                                                    | <b>Code</b> | <b>Type of Code</b> |
|---------------------------------------------------------------------|-------------|---------------------|
| Arthrodesis, posterior technique, craniocervical                    | 22590       | CPT procedure       |
| C1-C2 fusion                                                        | 22595       | CPT procedure       |
| Posterior cervical fusion                                           | 22600       | CPT procedure       |
| Posterior instrumentation                                           | 22840       | CPT procedure       |
| Cervical corpectomy                                                 | 63081       | CPT procedure       |
| Cervical laminoplasty greater than 2 Levels without graft and plate | 63050       | CPT procedure       |
| Cervical laminoplasty greater than 2 Levels with graft and plate    | 63051       | CPT procedure       |

**Inclusion criteria procedure codes for neuromonitoring**

| <b>Code Description</b>        | <b>Code</b>                                               | <b>Type of Code</b> |
|--------------------------------|-----------------------------------------------------------|---------------------|
| Somatosensory-evoked potential | 95925, 95926, 95927                                       | CPT procedure       |
| Motor-evoked potential         | 95928, 95929                                              | CPT procedure       |
| Electromyography               | 95860, 95861, 95862, 95863,<br>95864, 95869, 95870, 95872 | CPT procedure       |

**Inclusion criteria diagnosis codes for neurologic complications**

| <b>Code Description</b>                     | <b>Code</b> | <b>Type of Code</b> |
|---------------------------------------------|-------------|---------------------|
| Nervous system complications                | 997.0       | ICD-9-CM Diagnosis  |
| Nervous system complication,<br>unspecified | 997.00      | ICD-9-CM Diagnosis  |
| Central nervous system complication         | 997.01      | ICD-9-CM Diagnosis  |
| Other nervous system complications          | 997.09      | ICD-9-CM Diagnosis  |
